# Supplementary material
Source: PubMed Central journal article supplement (PMC2743093)
Supplement: NIHMS114283-supplement-01.pdf [file NIHMS114283-supplement-01.pdf]

**Supplemental Experimental Procedures****RT-PCR analysis**

To assess *ANKRD22* mRNA levels, total RNA was extracted from cells using Trizol Reagent (Invitrogen). RNA was reverse transcribed utilizing random primers with Stratagene's AffinityScript Multiple Temperature Reverse Transcriptase cDNA Synthesis kit (cat#200436). RT-PCR was performed according the QuantiTect® SYBR® Green I (Qiagen cat#204143) Master Mix protocol on ABI 7500 system using the following primers for ANKRD22: Forward: CCCCTTTGAGTATTGAGCA; Reverse: CACACTCACCGCTGACACTT. For the housekeeping gene GAPDH: Forward: GGTCTCCTCTGACTTCAAACA; Reverse: GTGAGGGTCTCTCTTCCT.

**In-cell western assay for PARP cleavage**

Cells were plated at a density of  $6 \times 10^3$  cells per well in 96-well plates. The following day, cells were infected with lentiviruses expressing control or K-RasB or C shRNAs. Twenty-four h post-infection, cells were treated with 1  $\mu$ g/ml puromycin. Forty-eight h later, cells were fixed in 4% paraformaldehyde and permeabilized with 0.1% Tx-100 in the presence of 10% goat serum. Cells were then blocked with 1% non-fat dairy milk for 15 min. Cells were then incubated with Cleaved PARP antibody (Cell Signaling) for 24h at 4°C. Cells were then incubated with Li-Cor IR-Dye 800 conjugated goat anti-mouse secondary for 1 h plus Syto-60 dye, as a loading control. Cell staining was then visualized with Li-Cor Odyssey scanner and quantitated.

**Parameters used for the PAM algorithm**

*Note: PAM is a module for the R program package.*

Tab-delimited text files were created for training and test data. CSV files from SGDI were opened in Excel, sorted in probeset id order, then exported as tab-delimited text.

| Filename              | Columns | Probe Sets |
|-----------------------|---------|------------|
| AllGenes_PAMTrain.txt | 15      | 52,920     |
| AllGenes_PAMTest.txt  | 30      | 52,920     |

### I. Start Up PAM

- From **Packages** menu, select **Load**, pamr.
- From **File** menu, select **Change dir...**, and browse to the directory containing the data files.

### II. Read the Training Set Data

```
data <- pamr.from.excel("AllGenes_AnuragPAMTrain.txt", 15,
sample.labels=TRUE)
```

### III. Train the Data

```
trainedData <- pamr.train(data)
```

### IV. Cross-Validate

```
set.seed(120)
results <- pamr.cv(trainedData, data)
pamr.plotcv(results)
```

- Examine the error curve and choose an appropriate threshold value.

```
pamr.plotcvprob(results, data, threshold=x.x)
```

### V. Estimate False Discovery Rates

```
fdr.obj <- pamr.fdr(trainedData, data, threshold=x.x)
pamr.plotfdr(fdr.obj)
```

- Examine the FDR curve and verify threshold value falls within an acceptable false discovery rate (around 2.5).

### VI. Get the Gene List

```
pamr.plotcen(trainedData, data, threshold=x.x)
pamr.geneplot(trainedData, data, threshold=x.x)
```

```
pamr.listgenes(trainedData, data, threshold=x.x, fitcv=results,  
genenames=TRUE)
```

## **VII. Predict Class of Test Data**

```
testData <- pamr.from.excel("AllGenes_AnuragPAMTest.txt", 30,  
sample.labels=TRUE)  
classPredict <- pamr.predict(trainedData, testData$x, threshold=x.x,  
type="class")  
probPredict <- pamr.predict(trainedData, testData$x, threshold=x.x,  
type="posterior")  
prediction <- cbind(testData$samplelabels, classPredict,  
probPredict)  
write.table(prediction, file="prediciton.txt", col.names=TRUE,  
quote=FALSE, sep="\t")
```

## Supplementary Figures and Legends

Singh et al. Supplementary Figure 1

**A**

Anova: Single Factor

### SUMMARY

| Groups          | Number of Lines | Mean RDI | Variance |
|-----------------|-----------------|----------|----------|
| RAS-INDEPENDENT | 17              | 1.383    | 0.0904   |
| RAS-DEPENDENT   | 17              | 5.316    | 5.0858   |

### ANOVA

| Source of Variation | SS      | df | MS      | F      | P-value  | F crit |
|---------------------|---------|----|---------|--------|----------|--------|
| Between Groups      | 131.482 | 1  | 131.482 | 50.801 | 4.35E-08 | 4.149  |
| Within Groups       | 82.821  | 32 | 2.588   |        |          |        |
| Total               | 214.303 | 33 |         |        |          |        |

**B**

|                  | <b>RDI</b>    | <b>RelativeCasp3 Cleavage</b> |
|------------------|---------------|-------------------------------|
| A549             | 0.612271443   | 0.539464105                   |
| SW1573           | 0.747458815   | 0.896674369                   |
| H23              | 0.779526361   | 0.726880852                   |
| H460             | 0.793419084   | 0.524686733                   |
| SK-LU-1          | 0.989259859   | 0.821241591                   |
| H727             | 1.840453722   | 1.336308068                   |
| H441             | 2.072743821   | 2.428367012                   |
| H358             | 2.102978438   | 2.28017945                    |
| H2009            | 2.351490754   | 2.392729846                   |
| PANC-1           | 0.91883158    | 0.331383659                   |
| PA-TU-8988T      | 1.021180446   | 0.539464105                   |
| SW1990           | 1.641141131   | 1.02953976                    |
| YAPC             | 3.727096814   | 2.398895665                   |
| HPAF-II          | 4.699546041   | 2.727118654                   |
| PA-TU-8902       | 8.78477499    | 2.718306788                   |
| Capan-1          | 9.955879487   | 2.921120209                   |
| n                | 15            |                               |
| r*               | 0.77          |                               |
| df               | 13            |                               |
| t*               | 4.351         |                               |
| <b>2-tailedp</b> | <b>0.0008</b> |                               |

**Figure S1.** (A) ANOVA calculations were performed on RDI values for cell lines that were classified as K-Ras-dependent or K-Ras-independent based on an apoptotic

response to K-Ras depletion by RNAi or a defined “Dependency Threshold” of 2.0. (B) Student T-Test showing a statistically significant correlation between RDI values and relative caspase-3 cleavage values ( $P=0.0008$ ).

Singh et al. Supplementary Figure 2

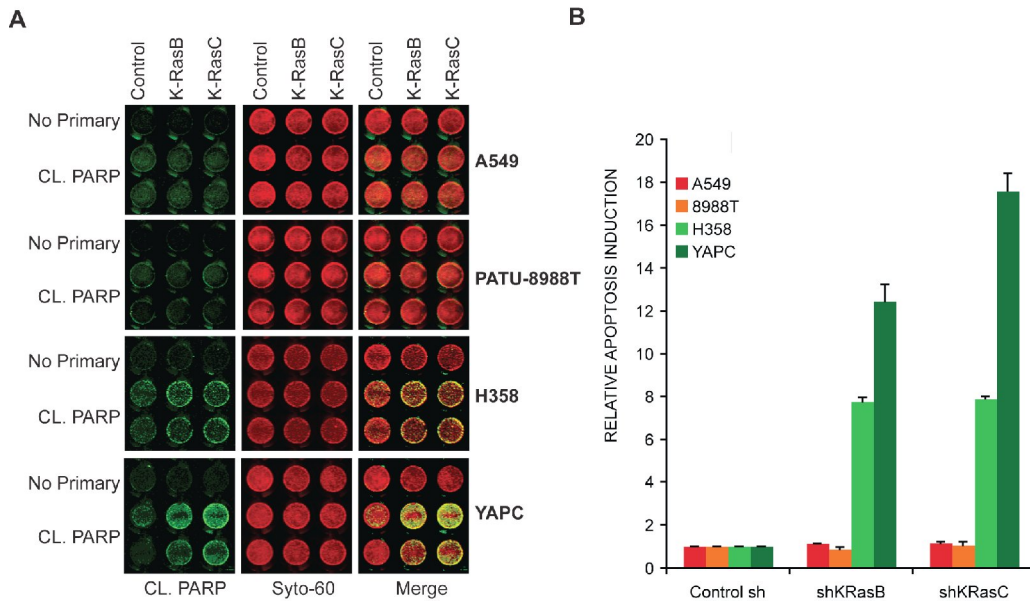

**Figure S2.** (A) Induction of PARP cleavage following K-Ras ablation in K-Ras-independent (A549 and PATU-8988T) and K-Ras-dependent cells (H358 and YAPC) as measured by In-Cell Western (ICW) assay. Cleaved PARP was detected by staining with a specific antibody, corresponding to the green signal. Syto-60 nuclear dye is shown in red as a loading control. (B) Quantitation of PARP cleavage corresponding to Relative Apoptosis Induction. Data are presented as the mean + SD.

A

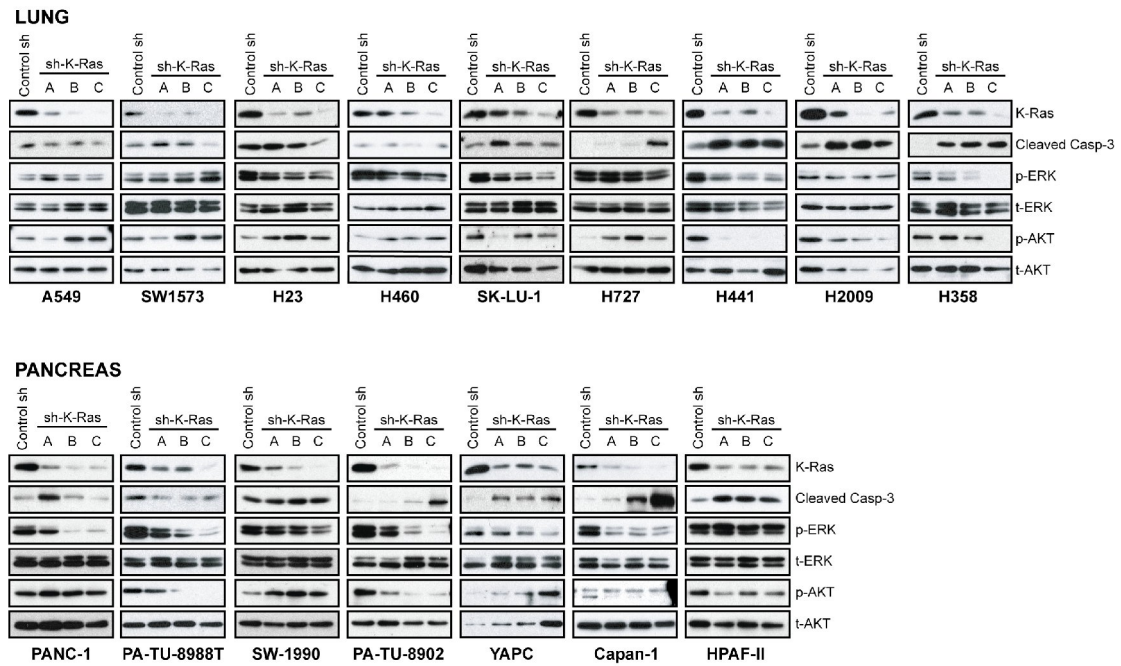

B

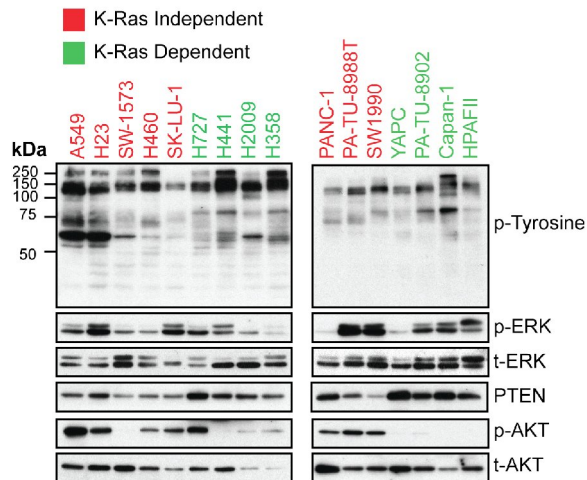

**Figure S3.** (A) Immunoblot analysis of ERK and AKT phosphorylation (p-ERK and p-AKT), as well as cleaved caspase-3 induction, following K-Ras ablation by shRNAs in lung and pancreas cancer cell lines assayed for K-Ras dependency in Figure 2. Total ERK and AKT (t-ERK and t-AKT are shown as loading controls).

(B) Immunoblot analysis of total tyrosine phosphorylated proteins as well as ERK and AKT phospho-activation, and PTEN expression in K-Ras-dependent (green) versus K-Ras-independent (red) cancer cell lines. GAPDH is shown as a protein loading control.

Singh et al. Supplementary Figure 4

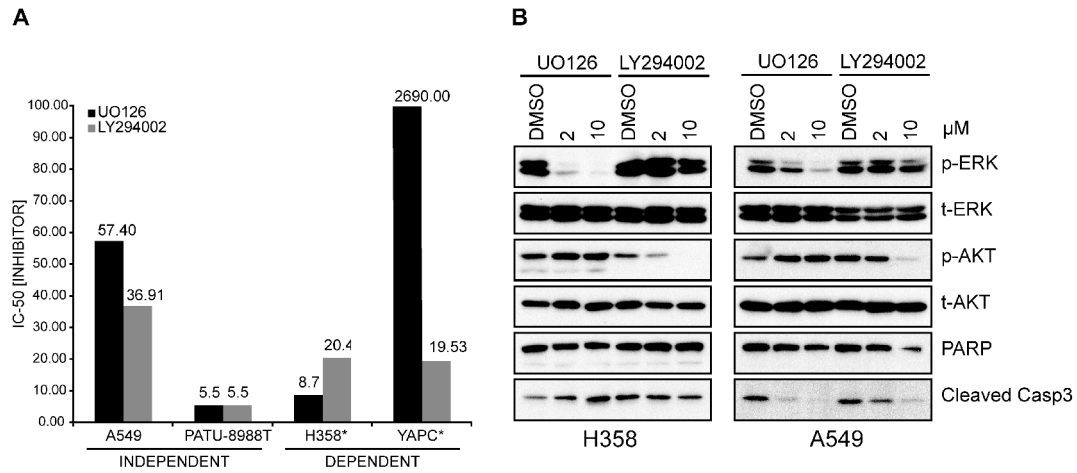

**Figure S4.** (A) IC-50 values for Mek (UO126 – black bars) and PI3K (LY294002 – gray bars) inhibitors in K-Ras-independent and K-Ras-dependent cell lines. (B) Erk and Akt phosphorylation as well as caspase-3 cleavage following treatment with Mek and PI3K inhibitors. Total ERK and AKT (t-ERK and t-AKT) are shown as loading controls.

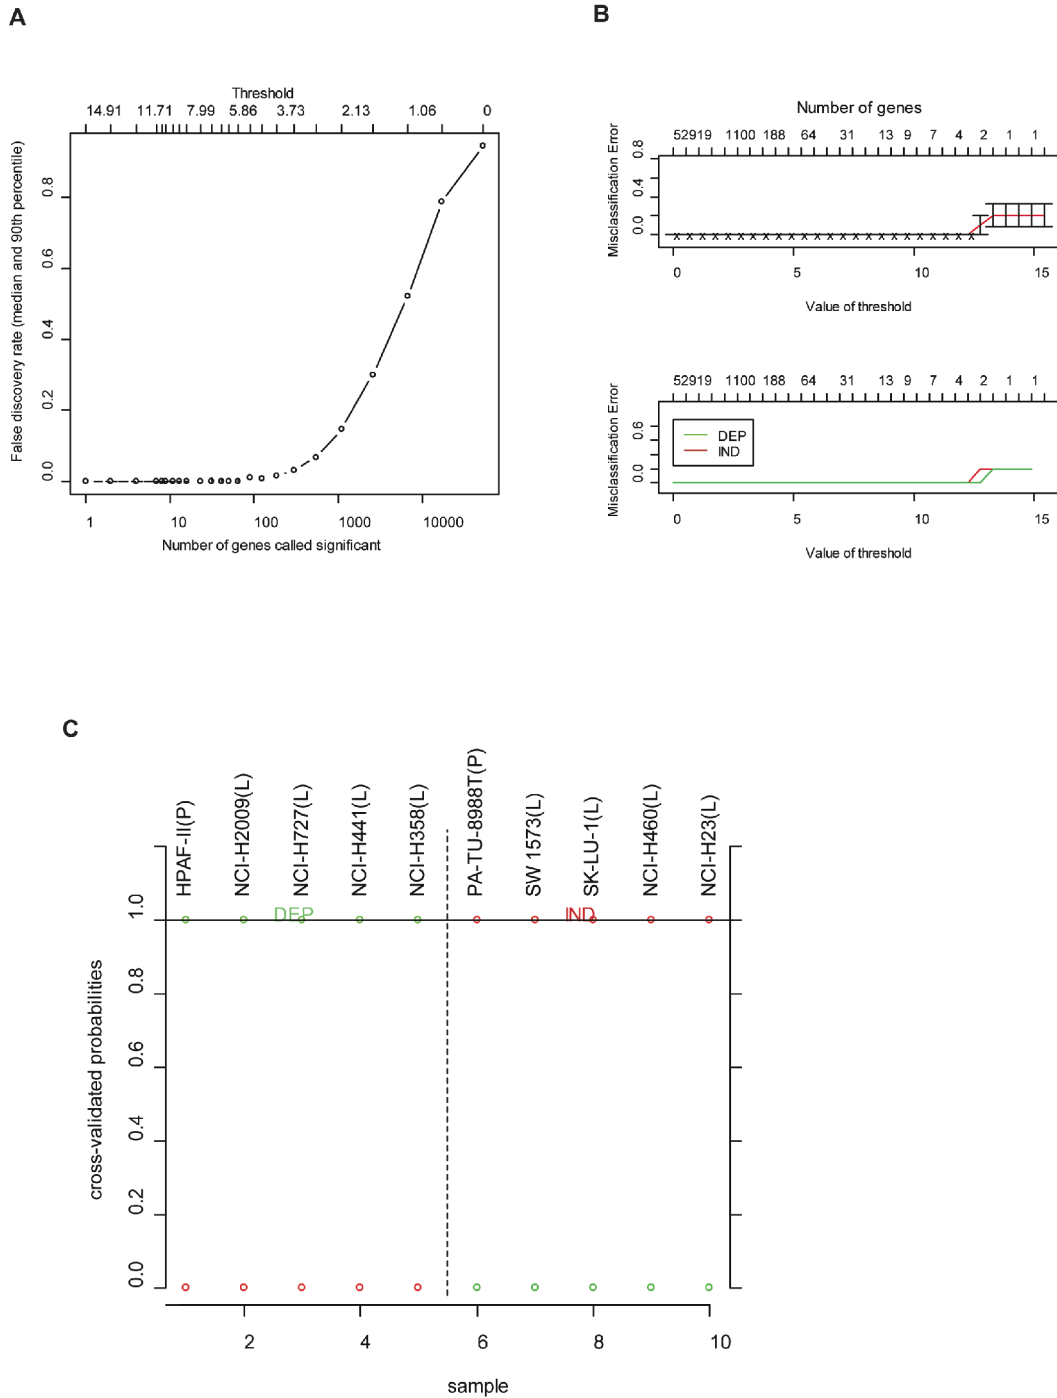

**Figure S5.** (A) False Discovery Rate as a function of the number of genes and/or the threshold parameter for the K-Ras dependency signature. (B) Misclassification errors as



a function of the threshold parameter. (C) Cross-validated probabilities for the training set of cell lines used to generate the K-Ras dependency signature and for generating prediction assignments for the “test-set” of cell lines. Green= K-Ras-dependent (DEP) and Red= K-Ras-independent (IND).

Singh et al. Supplementary Figure 6

| Category        | Term                                                     | Count | %    | P-Value  |
|-----------------|----------------------------------------------------------|-------|------|----------|
| GOTERM_CC_ALL   | intercellular junction                                   | 8     | 8.4  | 6.40E-06 |
| GOTERM_CC_ALL   | cell junction                                            | 11    | 11.6 | 1.10E-05 |
| GOTERM_CC_ALL   | membrane                                                 | 52    | 54.7 | 1.50E-05 |
| SP_PIR_KEYWORDS | membrane                                                 | 41    | 43.2 | 4.30E-05 |
| GOTERM_BP_ALL   | cell adhesion                                            | 12    | 12.6 | 9.20E-05 |
| GOTERM_BP_ALL   | biological adhesion                                      | 12    | 12.6 | 9.20E-05 |
| GOTERM_CC_ALL   | plasma membrane part                                     | 22    | 23.2 | 1.90E-04 |
| GOTERM_CC_ALL   | tight junction                                           | 5     | 5.3  | 3.00E-04 |
| INTERPRO        | Myelin P0 protein                                        | 3     | 3.2  | 3.50E-04 |
| GOTERM_CC_ALL   | membrane part                                            | 43    | 45.3 | 4.20E-04 |
| GOTERM_BP_ALL   | cell-cell adhesion                                       | 7     | 7.4  | 6.20E-04 |
| GOTERM_CC_ALL   | apical junction complex                                  | 5     | 5.3  | 6.30E-04 |
| GOTERM_CC_ALL   | apicolateral plasma membrane                             | 5     | 5.3  | 6.80E-04 |
| SP_PIR_KEYWORDS | glycoprotein                                             | 30    | 31.6 | 9.70E-04 |
| GOTERM_CC_ALL   | integral to membrane                                     | 38    | 40   | 1.50E-03 |
| GOTERM_CC_ALL   | intrinsic to membrane                                    | 38    | 40   | 1.60E-03 |
| SP_PIR_KEYWORDS | tight junction                                           | 4     | 4.2  | 1.70E-03 |
| SP_PIR_KEYWORDS | cell junction                                            | 7     | 7.4  | 2.20E-03 |
| UP_SEQ_FEATURE  | topological domain:Cytoplasmic                           | 23    | 24.2 | 2.60E-03 |
| UP_SEQ_FEATURE  | glycosylation site:N-linked (GlcNAc...)                  | 26    | 27.4 | 2.70E-03 |
| SP_PIR_KEYWORDS | transmembrane                                            | 32    | 33.7 | 2.80E-03 |
| UP_SEQ_FEATURE  | transmembrane region                                     | 26    | 27.4 | 4.80E-03 |
| GOTERM_CC_ALL   | apical plasma membrane                                   | 4     | 4.2  | 5.20E-03 |
| SP_PIR_KEYWORDS | cell adhesion                                            | 7     | 7.4  | 6.90E-03 |
| GOTERM_CC_ALL   | plasma membrane                                          | 25    | 26.3 | 9.50E-03 |
| GOTERM_CC_ALL   | apical part of cell                                      | 4     | 4.2  | 1.00E-02 |
| GOTERM_BP_ALL   | epithelial cell differentiation                          | 3     | 3.2  | 1.00E-02 |
| SP_PIR_KEYWORDS | calcium                                                  | 9     | 9.5  | 1.50E-02 |
| SP_PIR_KEYWORDS | serine protease                                          | 4     | 4.2  | 1.60E-02 |
| GOTERM_BP_ALL   | homophilic cell adhesion                                 | 4     | 4.2  | 1.60E-02 |
| GOTERM_BP_ALL   | epidermis development                                    | 4     | 4.2  | 1.70E-02 |
| UP_SEQ_FEATURE  | topological domain:Extracellular                         | 18    | 18.9 | 1.70E-02 |
| GOTERM_BP_ALL   | anatomical structure development                         | 15    | 15.8 | 2.00E-02 |
| GOTERM_BP_ALL   | ectoderm development                                     | 4     | 4.2  | 2.00E-02 |
| GOTERM_BP_ALL   | anatomical structure morphogenesis                       | 10    | 10.5 | 2.00E-02 |
| INTERPRO        | Low density lipoprotein-receptor, class A                | 3     | 3.2  | 2.20E-02 |
| SP_PIR_KEYWORDS | signal                                                   | 21    | 22.1 | 2.40E-02 |
| INTERPRO        | Epidermal growth factor receptor ligand                  | 2     | 2.1  | 2.50E-02 |
| UP_SEQ_FEATURE  | active site:Charge relay system                          | 4     | 4.2  | 2.70E-02 |
| KEGG_PATHWAY    | Leukocyte transendothelial migration                     | 4     | 4.2  | 2.80E-02 |
| INTERPRO        | Cadherin prodomain like                                  | 2     | 2.1  | 2.90E-02 |
| SP_PIR_KEYWORDS | carcinogenesis                                           | 2     | 2.1  | 3.00E-02 |
| SMART           | LDLa                                                     | 3     | 3.2  | 3.10E-02 |
| GOTERM_BP_ALL   | cell-cell signaling                                      | 7     | 7.4  | 3.30E-02 |
| UP_SEQ_FEATURE  | region of interest:Interactions with TJP1, TJP2 and TJP3 | 2     | 2.1  | 3.30E-02 |
| KEGG_PATHWAY    | Cell adhesion molecules (CAMs)                           | 4     | 4.2  | 3.50E-02 |
| KEGG_PATHWAY    | Tight junction                                           | 4     | 4.2  | 3.80E-02 |
| GOTERM_BP_ALL   | morphogenesis of an epithelium                           | 3     | 3.2  | 3.80E-02 |

**Figure S6.** Term enrichment analysis of the K-Ras dependency signature genes using the EASE algorithm from The Database for Annotation, Visualization and Integrated Discovery (DAVID).

**Supplementary Figure 7.**

| Cell Line  | Tissue    | Prediction | DEP      | IND         |
|------------|-----------|------------|----------|-------------|
| SW 1116    | Intestine | DEP        | 1        | 3.50E-93    |
| Panc 08.13 | Pancreas  | DEP        | 1        | 5.62E-122   |
| RCM-1      | Intestine | DEP        | 1        | 2.22E-91    |
| NCI-H1573  | Lung      | DEP        | 1        | 1.09E-69    |
| NCI-H1734  | Lung      | DEP        | 1        | 1.76E-25    |
| NCI-H2122  | Lung      | DEP        | 1        | 9.44E-81    |
| GP5D       | Intestine | DEP        | 1        | 1.39E-67    |
| KYSE-410   | Esophagus | DEP        | 1        | 2.06E-74    |
| AGS        | Stomach   | DEP        | 1        | 6.60E-64    |
| HuCCT1     | Liver     | DEP        | 1        | 3.97E-81    |
| LS174T     | Intestine | DEP        | 1        | 1.90E-67    |
| SW 1463    | Intestine | DEP        | 1        | 5.32E-80    |
| T84        | Intestine | DEP        | 1        | 1.78E-79    |
| HCT 116    | Intestine | DEP        | 1        | 1.31E-14    |
| SW837      | Intestine | DEP        | 1        | 8.58E-75    |
| HUP-T4     | Pancreas  | DEP        | 1        | 1.07E-105   |
| LU99A      | Lung      | IND        | 1.82E-73 | 1           |
| SNG-M      | Uterus    | IND        | 4.67E-44 | 1           |
| A-427      | Lung      | IND        | 1.84E-39 | 1           |
| SW 900     | Lung      | IND        | 2.54E-05 | 0.999974636 |
| NCI-H1155  | Lung      | IND        | 5.07E-27 | 1           |
| LU65       | Lung      | IND        | 2.53E-56 | 1           |
| Calu-1     | Lung      | IND        | 5.96E-72 | 1           |
| NOMO-1/ADM | Blood     | IND        | 5.04E-24 | 1           |
| KP-1N      | Pancreas  | IND        | 4.72E-81 | 1           |
| SUIT-2     | Pancreas  | IND        | 3.65E-29 | 1           |
| HEC-1      | Uterus    | IND        | 3.55E-81 | 1           |
| TCO-1      | Thymus    | IND        | 9.34E-76 | 1           |
| KP-4       | Pancreas  | IND        | 2.93E-81 | 1           |
| NCI-H1792  | Lung      | IND        | 7.48E-76 | 1           |

**Figure S7.** Table showing prediction of Ras dependencies for a large panel of *K-Ras* mutant cell lines as assigned by the PAM algorithm. DEP = predicted to be K-Ras-dependent; IND = predicted to K-Ras-independent. Cell lines in green were experimentally determined to be K-Ras-dependent whereas those in red were found to be K-Ras-independent.

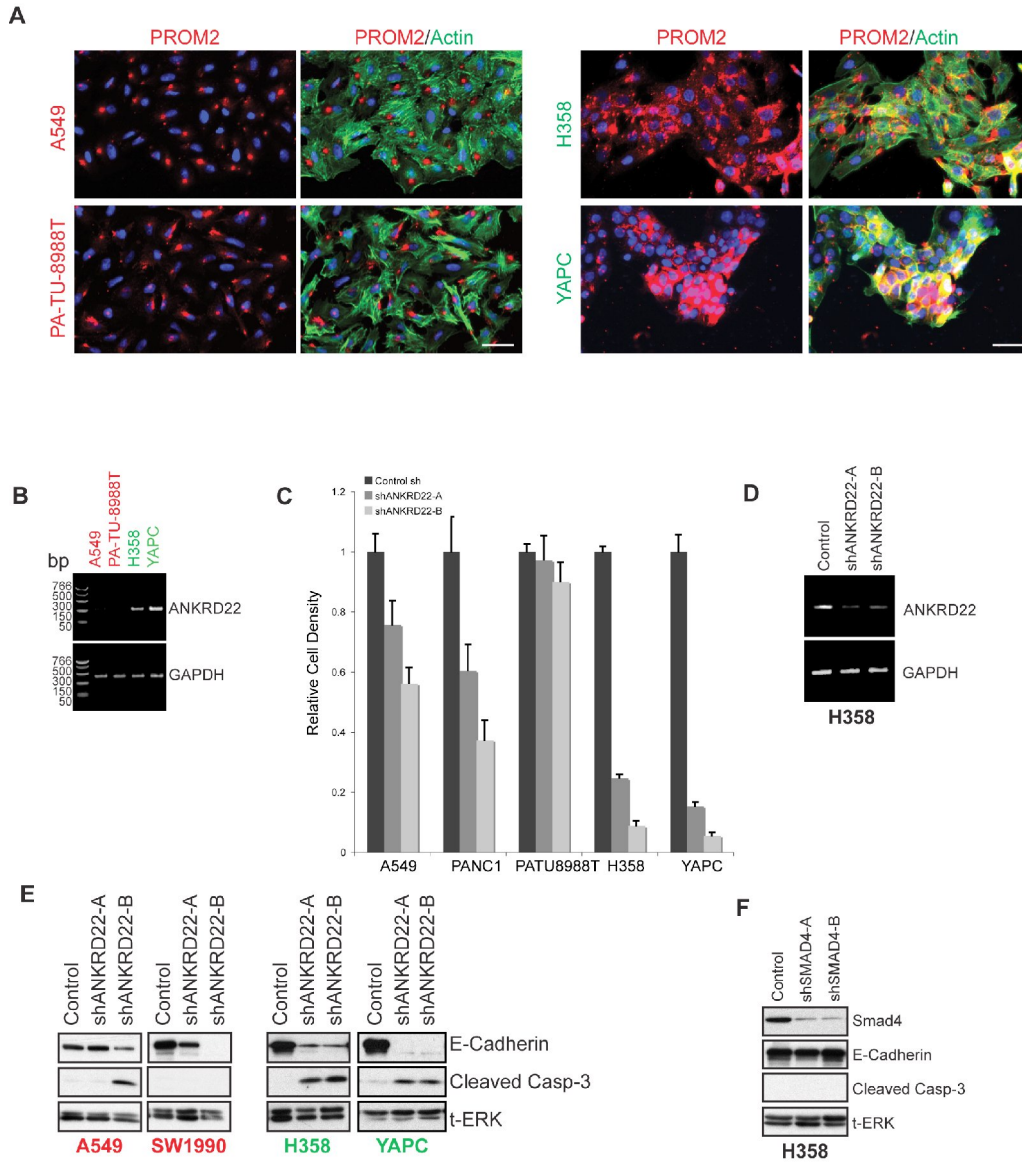

**Figure S8.** (A) Fluorescence microscopy analysis of expression of PROM2 (red signal), a K-Ras dependency signature gene, in K-Ras-dependent (H358 and YAPC) and K-Ras-independent (PA-TU-8988T and A549) cell lines. Green signal corresponds to F-actin, as revealed by phalloidin staining. Scale bar = 15µM.

(B) *ANKRD22* mRNA levels in a subset of K-Ras-dependent (green) and K-Ras-independent (red) cell lines as assessed by RT-PCR. DNA size markers are shown in the leftmost lane in base pairs (bp).

(C) Differential growth inhibitory effects of *ANKRD22* ablation in K-Ras-dependent (H358 and YAPC) versus K-Ras-independent cell lines (A549, PANC1 and PATU8988T). Data are represented as the mean + SD.

(D) Reduced RNAi-mediated *ANKRD22* mRNA levels in H358 cells.

(E) Ablation of *AKRD22* in K-Ras-dependent cells and effects on E-Cadherin expression and cleaved caspase-3 associated cell death, as assessed by western blotting. Total ERK (t-ERK) is shown as a loading control.

(F) ShRNA-mediated ablation of *SMAD4* in H358 cells and effects on E-Cadherin expression and cleaved caspase-3 induction. Total ERK (t-ERK) is shown as a loading control.

Singh et al. Supplementary Figure 9

## LUNG

|           | K-Ras       | PIK3CA      | CTNNB1     | MADH4 | RB1 | TP53            | p16/INK4A |
|-----------|-------------|-------------|------------|-------|-----|-----------------|-----------|
| A549      | G12S (HOMO) | WT          | WT         | WT    | WT  | WT              | HD        |
| NCI-H460  | Q61H (HOMO) | WT          | WT         | WT    | WT  | WT              | HD        |
| NCI-H23   | G12C (HET)  | WT          | WT         | WT    | WT  | M246I           | WT        |
| SW1573    | G12C        | K111E (HET) | S33F (HET) | HD    | WT  | WT              | HD        |
| SK-LU-1   | G12D        | WT          | WT         | WT    | WT  | WT              | HD        |
| NCI-H358  | G12C (HET)  | WT          | T75A (HET) | WT    | WT  | WT              | WT        |
| NCI-H2009 | G12A (HET)  | WT          | WT         | WT    | HD  | R273L           | WT        |
| NCI-H727  | G12V (HOMO) | WT          | WT         | WT    | WT  | Q165 S166insYKQ | WT        |
| NCI-H441  | G12V (HET)  | WT          | WT         | WT    | WT  | WT              | WT        |

## PANCREAS

|             | K-Ras       | MADH4  | TP53  | INK4A |
|-------------|-------------|--------|-------|-------|
| PANC-1      | G12D (HET)  | WT     | H273  | HD    |
| PA-TU-8988T | G12V (HOMO) |        |       |       |
| SW1990      | G12D (HOMO) | WT     | WT    | HD    |
| PA-TU-8902  | G12V        |        |       |       |
| YAPC        | G12V (HOMO) | HD     | H179R | HD    |
| Capan-1     | G12V (HOMO) | pS343* | A159V | HD    |
| HPAF II     | G12D (HET)  | WT     | P151S | HD    |

**Figure S9.** Mutational status of known oncogenes and tumor suppressor genes in *K-Ras* mutant lung and pancreatic cancer cell lines used in this study.

**Supplementary Table1.** K-Ras dependency signature genes and corresponding Affymetrix probeset IDs. The top 250 probes were used to generate the heatmap in Figure 5E. Genes verified to be expressed in K-Ras dependent cells are highlighted in green, whereas those expressed in independent cells are highlighted in red.

| Affymetrix Probe ID     | Gene Symbol                     | DEP-score | IND-score |
|-------------------------|---------------------------------|-----------|-----------|
| g4507328_3p_a_at        | SYK                             | 4.0281    | -4.0281   |
| Hs.24743.1.A1_3p_at     | RBM35A                          | 3.3478    | -3.3478   |
| g8923166_3p_a_at        | RBM35A                          | 3.0155    | -3.0155   |
| Hs.56937.1.S1_3p_a_at   | ST14                            | 2.8812    | -2.8812   |
| Hs.85335.0.A1_3p_at     | TMEM30B                         | 2.7817    | -2.7817   |
| g4504328_3p_at          | SPINT1                          | 2.7352    | -2.7352   |
| Hs.74101.2.S1_3p_at     | SYK                             | 2.6864    | -2.6864   |
| Hs.74101.2.S1_3p_a_at   | SYK                             | 2.3608    | -2.3608   |
| g9966860_3p_at          | RAB25                           | 2.2896    | -2.2896   |
| Hs.188881.0.A1_3p_at    | C1orf172                        | 2.159     | -2.159    |
| g13376381_3p_at         | GRHL2                           | 2.1037    | -2.1037   |
| Hs.278611.0.S1_3p_a_at  | GALNT3                          | 1.963     | -1.963    |
| g4506814_3p_at          | SCNN1A                          | 1.909     | -1.909    |
| g9392652_3p_at          | EVA1                            | 1.7071    | -1.7071   |
| Hs.57664.0.S1_3p_at     | ITGB6                           | 1.7038    | -1.7038   |
| Hs.11801.0.S2_3p_at     | C1orf74                         | 1.6883    | -1.6883   |
| g13528968_3p_at         | INPP4B                          | 1.6168    | -1.6168   |
| g4505630_3p_s_at        | PCDH1                           | 1.5484    | -1.5484   |
| Hs2.98573.1.S1_3p_s_at  | C6orf141                        | 1.5167    | -1.5167   |
| g4826763_3p_a_at        | HS3ST1                          | 1.5134    | -1.5134   |
| g4502756_3p_a_at        | CDS1                            | 1.5125    | -1.5125   |
| Hs.76853.0.S1_3p_at     | DNAJA4                          | 1.5051    | -1.5051   |
| g11065890_3p_a_at       | F11R                            | 1.4376    | -1.4376   |
| Hs2.145582.1.S1_3p_s_at | PROM2                           | 1.4203    | -1.4203   |
| g10835007_3p_at         | CLDN7                           | 1.4171    | -1.4171   |
| g13129133_3p_at         | UNKNOWN/INVALID SYMBOL:(653098) | 1.4038    | -1.4038   |
| Hs.115166.1.S1_3p_at    | SCEL                            | 1.3739    | -1.3739   |
| g5031844_3p_at          | LAD1                            | 1.356     | -1.356    |
| g4506798_3p_a_at        | SCEL                            | 1.3383    | -1.3383   |
| Hs2.210473.1.S2_3p_at   | SCIN                            | 1.3156    | -1.3156   |
| g11415039_3p_x_at       | ST14                            | 1.2894    | -1.2894   |
| g10190711_3p_at         | S100A14                         | 1.2733    | -1.2733   |
| Hs.268362.0.A1_3p_at    | ANKRD22                         | 1.2731    | -1.2731   |
| g4505630_3p_x_at        | PCDH1                           | 1.2459    | -1.2459   |
| Hs.76550.0.S1_3p_at     | MAL2                            | 1.2422    | -1.2422   |
| Hs.52620.2.S1_3p_at     | CDS1                            | 1.2381    | -1.2381   |
| Hs.8364.1.A1_3p_at      | EHF                             | 1.1968    | -1.1968   |
| g11967980_3p_s_at       | RAB17                           | 1.1724    | -1.1724   |
| g8922753_3p_at          | C1orf106                        | 1.1536    | -1.1536   |
| 1552575_3p_a_at         | C6orf141                        | 1.1522    | -1.1522   |
| Hs.79170.0.S1_3p_at     | TTC9                            | 1.0957    | -1.0957   |

|                         |           |        |         |
|-------------------------|-----------|--------|---------|
| Hs.43355.0.A1_3p_at     | DENND1C   | 1.0869 | -1.0869 |
| Hs.52620.2.S2_3p_at     | CDS1      | 1.0731 | -1.0731 |
| g189084_3p_at           | CEACAM6   | 1.0344 | -1.0344 |
| g12653328_3p_s_at       | MAPK13    | 1.0334 | -1.0334 |
| g5032246_3p_a_at        | EVA1      | 1.0298 | -1.0298 |
| Hs.15396.0.A1_3p_at     | LOC196264 | 1.005  | -1.005  |
| Hs.108502.0.S1_3p_a_at  | BSPRY     | 0.9841 | -0.9841 |
| g13027607_3p_at         | C1orf116  | 0.9626 | -0.9626 |
| Hs2.98573.2.S1_3p_at    | C6orf141  | 0.9472 | -0.9472 |
| g8923147_3p_a_at        | BSPRY     | 0.9266 | -0.9266 |
| Hs.177164.0.A1_3p_at    | VSIG1     | 0.9141 | -0.9141 |
| Hs.323439.0.A1_3p_at    | KIAA0703  | 0.9092 | -0.9092 |
| g7705976_3p_at          | TMPRSS4   | 0.8894 | -0.8894 |
| g12653328_3p_at         | MAPK13    | 0.8637 | -0.8637 |
| g4507460_3p_at          | TGFA      | 0.8383 | -0.8383 |
| g8923677_3p_at          | EPN3      | 0.8373 | -0.8373 |
| g4503596_3p_a_at        | ERBB3     | 0.8309 | -0.8309 |
| Hs2.158963.1.S1_3p_x_at | C1orf210  | 0.8269 | -0.8269 |
| Hs.283552.0.S1_3p_a_at  | TMEM45B   | 0.8066 | -0.8066 |
| Hs.220745.0.S1_3p_at    | RALGPS2   | 0.8051 | -0.8051 |
| g11386156_3p_at         | CDA       | 0.7775 | -0.7775 |
| g4757959_3p_a_at        | CDH1      | 0.7627 | -0.7627 |
| Hs.97774.0.A1_3p_at     | SYTL5     | 0.7543 | -0.7543 |
| g4503786_3p_a_at        | FRK       | 0.7479 | -0.7479 |
| g13544025_3p_s_at       | OVOL2     | 0.7362 | -0.7362 |
| Hs.170673.0.A1_3p_at    | RDHE2     | 0.7337 | -0.7337 |
| g12583651_3p_at         | LOC653857 | 0.7324 | -0.7324 |
| g7657171_3p_at          | B3GNT3    | 0.7276 | -0.7276 |
| g7662255_3p_s_at        | KIAA0703  | 0.7213 | -0.7213 |
| g4503366_3p_at          | DPP4      | 0.7093 | -0.7093 |
| g11545838_3p_at         | PRSS22    | 0.7011 | -0.7011 |
| g9944939_3p_s_at        | EPS8L1    | 0.6975 | -0.6975 |
| g13435148_3p_at         | RBM35B    | 0.6964 | -0.6964 |
| g902370_3p_a_at         | EFNB2     | 0.6864 | -0.6864 |
| Hs.10119.0.S1_3p_at     | CGNL1     | 0.6753 | -0.6753 |
| g4557710_3p_a_at        | LAMA3     | 0.6655 | -0.6655 |
| Hs.182704.0.A1_3p_at    | PGM2L1    | 0.658  | -0.658  |
| g2338755_3p_at          | ELF3      | 0.6548 | -0.6548 |
| Hs.12332.0.A1_3p_at     | PLEKHA7   | 0.6397 | -0.6397 |
| g1841524_3p_a_at        | ELF3      | 0.6387 | -0.6387 |
| g4759231_3p_at          | TIAF1     | 0.6285 | -0.6285 |
| Hs.97013.0.A1_3p_at     | C11orf52  | 0.6281 | -0.6281 |
| Hs.49397.0.A1_3p_at     | EPB41L5   | 0.6199 | -0.6199 |
| Hs.283552.0.S1_3p_x_at  | TMEM45B   | 0.6138 | -0.6138 |
| g7657171_3p_x_at        | B3GNT3    | 0.6085 | -0.6085 |
| Hs.59509.0.A1_3p_at     | KRTCAP3   | 0.605  | -0.605  |
| Hs.199067.2.A1_3p_at    | ERBB3     | 0.5812 | -0.5812 |
| Hs.3454.0.A1_3p_at      | RAB11FIP4 | 0.5761 | -0.5761 |
| g4505992_3p_at          | PPL       | 0.5751 | -0.5751 |
| g13435365_3p_a_at       | DSC2      | 0.5719 | -0.5719 |
| g4505058_3p_a_at        | TACSTD1   | 0.5707 | -0.5707 |
| Hs.72222.1.S1_3p_a_at   | FER1L4    | 0.5615 | -0.5615 |
| Hs2.11801.1.S1_3p_s_at  | IRF6      | 0.5612 | -0.5612 |
| g340184_3p_a_at         | CDH1      | 0.5595 | -0.5595 |

|                        |          |        |         |
|------------------------|----------|--------|---------|
| g6434903_3p_at         | TSPAN1   | 0.5552 | -0.5552 |
| g4557734_3p_a_at       | MAOA     | 0.5516 | -0.5516 |
| g5457118_3p_s_at       | F11R     | 0.5504 | -0.5504 |
| g4502876_3p_at         | CLDN4    | 0.5494 | -0.5494 |
| Hs.120219.0.A1_3p_at   | TMEM154  | 0.531  | -0.531  |
| Hs.168953.0.A1_3p_at   | EVA1     | 0.5287 | -0.5287 |
| Hs.39871.0.S1_3p_at    | MYO1D    | 0.5276 | -0.5276 |
| Hs.79170.0.S2_3p_at    | TTC9     | 0.514  | -0.514  |
| Hs.57887.0.A1_3p_at    | GPR115   | 0.5077 | -0.5077 |
| Hs.192822.0.A1_3p_at   | PPP1R14C | 0.5049 | -0.5049 |
| g12655880_3p_at        | PKIB     | 0.4898 | -0.4898 |
| g6912529_3p_at         | TSPAN15  | 0.4824 | -0.4824 |
| g4885524_3p_s_at       | SH2D3A   | 0.4816 | -0.4816 |
| g4502078_3p_a_at       | AMPD3    | 0.4789 | -0.4789 |
| Hs.217484.0.A1_3p_x_at | ANKRD22  | 0.4781 | -0.4781 |
| g5454143_3p_a_at       | UBD      | 0.4762 | -0.4762 |
| Hs2.57787.1.S1_3p_s_at | MTAC2D1  | 0.4692 | -0.4692 |
| Hs.145807.0.S1_3p_a_at | TMC5     | 0.4607 | -0.4607 |
| Hs.13337.0.A1_3p_at    | PGM2L1   | 0.4517 | -0.4517 |
| Hs.161002.0.S1_3p_at   | AIM1     | 0.4314 | -0.4314 |
| g7705954_3p_at         | ACP6     | 0.4276 | -0.4276 |
| Hs.188881.0.A1_3p_x_at | C1orf172 | 0.4224 | -0.4224 |
| g4502198_3p_at         | AREG     | 0.4201 | -0.4201 |
| Hs.111334.4.S1_3p_at   | FAM102A  | 0.4178 | -0.4178 |
| Hs.93738.0.S1_3p_at    | ZNF608   | 0.4175 | -0.4175 |
| Hs.187646.0.A1_3p_at   | TMEM65   | 0.411  | -0.411  |
| Hs.322735.0.A1_3p_at   | KIAA1522 | 0.4062 | -0.4062 |
| 4861120_3p_s_at        | C5orf4   | 0.4041 | -0.4041 |
| Hs.172674.4.A1_3p_at   | NFATC3   | 0.4041 | -0.4041 |
| Hs2.21599.2.S1_3p_s_at | KLF7     | 0.399  | -0.399  |
| Hs.173334.2.S1_3p_at   | ELL2     | 0.3982 | -0.3982 |
| g12962938_3p_a_at      | OTUB2    | 0.3953 | -0.3953 |
| Hs.51965.0.S1_3p_at    | PLEKHG1  | 0.3897 | -0.3897 |
| g12804894_3p_a_at      | FUT2     | 0.3862 | -0.3862 |
| g4505264_3p_x_at       | MST1R    | 0.3855 | -0.3855 |
| Hs.82845.0.S1_3p_at    | SORL1    | 0.3854 | -0.3854 |
| g4505264_3p_at         | MST1R    | 0.3821 | -0.3821 |
| g6325473_3p_at         | SORL1    | 0.3817 | -0.3817 |
| Hs.159115.0.S1_3p_at   | IKZF2    | 0.3793 | -0.3793 |
| g12803726_3p_x_at      | KRT7     | 0.3783 | -0.3783 |
| Hs.122489.0.S1_3p_at   | C4orf34  | 0.378  | -0.378  |
| Hs.224012.0.S1_3p_at   | JAG1     | 0.3744 | -0.3744 |
| g7705414_3p_at         | HOOK1    | 0.3711 | -0.3711 |
| Hs.11101.0.S1_3p_at    | DLG3     | 0.3674 | -0.3674 |
| g12803726_3p_at        | KRT7     | 0.3556 | -0.3556 |
| g7799987_3p_a_at       | KCNMB4   | 0.3542 | -0.3542 |
| Hs.293902.0.A1_3p_at   | C12orf46 | 0.3533 | -0.3533 |
| Hs.95549.0.A1_3p_a_at  | FLJ20273 | 0.3521 | -0.3521 |
| g13477106_3p_s_at      | CEACAM6  | 0.3453 | -0.3453 |
| Hs.301175.1.S1_3p_s_at | RAC2     | 0.3367 | -0.3367 |
| Hs.50841.0.A1_3p_at    | Gcom1    | 0.336  | -0.336  |
| Hs.299254.0.S1_3p_at   | HOOK1    | 0.3296 | -0.3296 |
| Hs.283552.1.S1_3p_a_at | TMEM45B  | 0.3223 | -0.3223 |
| Hs.21554.0.S1_3p_at    | KIAA1107 | 0.3211 | -0.3211 |

|                          |           |        |         |
|--------------------------|-----------|--------|---------|
| g12653994_3p_a_at        | STAP2     | 0.32   | -0.32   |
| Hs.23582.0.A2_3p_a_at    | TACSTD2   | 0.3171 | -0.3171 |
| g5031630_3p_a_at         | SCARB2    | 0.3114 | -0.3114 |
| g8308175_3p_a_at         | CGN       | 0.3079 | -0.3079 |
| g4506152_3p_at           | PRSS8     | 0.3059 | -0.3059 |
| g13376137_3p_a_at        | TMC5      | 0.301  | -0.301  |
| g4759083_3p_at           | DHRS3     | 0.3004 | -0.3004 |
| g13325163_3p_a_at        | C1orf34   | 0.2976 | -0.2976 |
| Hs.153028.2.S2_3p_at     | CYB561    | 0.2954 | -0.2954 |
| g439225_3p_at            | FBP1      | 0.2898 | -0.2898 |
| Hs.23240.0.S1_3p_at      | ZNF468    | 0.286  | -0.286  |
| g13236539_3p_a_at        | GDPD3     | 0.2856 | -0.2856 |
| g11545786_3p_a_at        | EGLN3     | 0.2847 | -0.2847 |
| Hs.9598.1.S1_3p_a_at     | SEMA4B    | 0.2822 | -0.2822 |
| g9506400_3p_at           | ARHGEF3   | 0.2808 | -0.2808 |
| g4507864_3p_at           | VAMP8     | 0.2784 | -0.2784 |
| Hs.236894.0.A1_3p_at     | LOC146795 | 0.2746 | -0.2746 |
| Hs.18376.0.S1_3p_a_at    | CGN       | 0.2741 | -0.2741 |
| g10190675_3p_a_at        | RIPK4     | 0.2734 | -0.2734 |
| Hs.226562.0.S1_3p_at     | EHF       | 0.2725 | -0.2725 |
| Hs.2.351442.2.S1_3p_at   | RASEF     | 0.2689 | -0.2689 |
| g13129041_3p_at          | PRKCH     | 0.2679 | -0.2679 |
| g9507120_3p_a_at         | SLC37A1   | 0.2676 | -0.2676 |
| g13876385_3p_s_at        | EPPK1     | 0.2674 | -0.2674 |
| Hs.30942.0.S3_3p_at      | EFNB2     | 0.2614 | -0.2614 |
| Hs.2.145582.3.S1_3p_s_at | PROM2     | 0.2613 | -0.2613 |
| Hs.23071.0.A1_3p_at      | STON2     | 0.2613 | -0.2613 |
| Hs.105959.0.A1_3p_at     | PGM2L1    | 0.2538 | -0.2538 |
| g12056467_3p_a_at        | JUP       | 0.2526 | -0.2526 |
| g4758287_3p_at           | EPHB3     | 0.2494 | -0.2494 |
| Hs.18878.0.A1_3p_a_at    | EGLN3     | 0.245  | -0.245  |
| Hs.184581.0.A1_3p_at     | RPS6KA2   | 0.2442 | -0.2442 |
| g340300_3p_a_at          | VEGF      | 0.2406 | -0.2406 |
| g4502040_3p_at           | ALDH1A3   | 0.2349 | -0.2349 |
| g4826983_3p_a_at         | ROD1      | 0.2288 | -0.2288 |
| Hs.21420.0.S2_3p_s_at    | PAK6      | 0.226  | -0.226  |
| Hs.2.2719.5.A1_3p_s_at   | WFDC2     | 0.2252 | -0.2252 |
| Hs.23317.0.A1_3p_at      | TMEM87B   | 0.2243 | -0.2243 |
| Hs.201661.0.A1_3p_at     | PLEKHA7   | 0.2226 | -0.2226 |
| g9964114_3p_a_at         | SP110     | 0.2222 | -0.2222 |
| Hs.2.98573.1.S1_3p_x_at  | C6orf141  | 0.2184 | -0.2184 |
| Hs.71779.0.S1_3p_at      | C19orf21  | 0.2183 | -0.2183 |
| g7328555_3p_a_at         | TNFSF13   | 0.2182 | -0.2182 |
| g5901560_3p_s_at         | VEGF      | 0.2135 | -0.2135 |
| Hs.77348.0.S1_3p_a_at    | HPGD      | 0.2122 | -0.2122 |
| Hs.25740.0.S1_3p_a_at    | ERO1L     | 0.2112 | -0.2112 |
| Hs.137313.0.A1_3p_at     | SPINT1    | 0.2096 | -0.2096 |
| Hs.200412.0.S1_3p_at     | EPPK1     | 0.2059 | -0.2059 |
| g4557252_3p_a_at         | ADAM8     | 0.2051 | -0.2051 |
| Hs.67928.0.A1_3p_at      | ELF3      | 0.2035 | -0.2035 |
| Hs.19978.5.S1_3p_a_at    | ARSD      | 0.2033 | -0.2033 |
| Hs.23881.1.A1_3p_at      | KRT7      | 0.2029 | -0.2029 |
| g1203981_3p_a_at         | HPGD      | 0.2027 | -0.2027 |
| g12804234_3p_a_at        | CYB561    | 0.2017 | -0.2017 |



|                        |               |        |         |
|------------------------|---------------|--------|---------|
| Hs.49136.0.A1_3p_at    | FAM84B        | 0.1993 | -0.1993 |
| 209771_3p_x_at         | CD24          | 0.1973 | -0.1973 |
| g13236537_3p_at        | FA2H          | 0.1947 | -0.1947 |
| g13124448_3p_a_at      | F11R          | 0.1935 | -0.1935 |
| g4557296_3p_a_at       | ALAD          | 0.1927 | -0.1927 |
| Hs.135643.0.A1_3p_at   | EMG1          | 0.1908 | -0.1908 |
| Hs.95612.0.A1_3p_at    | DSC2          | 0.1901 | -0.1901 |
| g1695875_3p_s_at       | IL13RA1       | 0.1896 | -0.1896 |
| Hs.286124.0.A2_3p_s_at | CD24          | 0.1862 | -0.1862 |
| g7706171_3p_at         | TNFRSF21      | 0.1858 | -0.1858 |
| Hs.296259.0.S1_3p_at   | PON3          | 0.1837 | -0.1837 |
| 1554246_3p_at          | C1orf210      | 0.1817 | -0.1817 |
| Hs.67776.0.A1_3p_at    | FAM83H        | 0.1815 | -0.1815 |
| g4504038_3p_at         | GNA15         | 0.1806 | -0.1806 |
| g3719220_3p_a_at       | VEGF          | 0.1801 | -0.1801 |
| g899458_3p_a_at        | YWHAZ         | 0.1788 | -0.1788 |
| g13111771_3p_a_at      | ARHGEF10L     | 0.1787 | -0.1787 |
| g12053164_3p_at        | SLC41A2       | 0.1727 | -0.1727 |
| Hs.122244.0.A1_3p_at   | C1orf116      | 0.1717 | -0.1717 |
| Hs.234786.0.A1_3p_at   | ACOT11        | 0.1711 | -0.1711 |
| g4505198_3p_at         | NR3C2         | 0.1711 | -0.1711 |
| Hs.2.149377.1.S1_3p_at | KIAA1217      | 0.1691 | -0.1691 |
| g2047312_3p_a_at       | HPGD          | 0.167  | -0.167  |
| g6382072_3p_at         | GCHFR         | 0.1647 | -0.1647 |
| Hs.162189.1.S1_3p_at   | KALRN         | 0.163  | -0.163  |
| g4504706_3p_at         | INPP4B        | 0.1621 | -0.1621 |
| g4506954_3p_a_at       | ST3GAL5       | 0.1596 | -0.1596 |
| Hs.65641.1.A1_3p_at    | SAMD9         | 0.1589 | -0.1589 |
| g7657308_3p_at         | LMCD1         | 0.1589 | -0.1589 |
| 208651_3p_x_at         | CD24          | 0.1586 | -0.1586 |
| Hs.149018.0.S1_3p_at   | WFDC3         | 0.1577 | -0.1577 |
| Hs.2.397084.1.S1_3p_at | TMEM49        | 0.1559 | -0.1559 |
| g7657036_3p_at         | DOC1          | 0.1535 | -0.1535 |
| L33930_3p_s_at         | CD24          | 0.1535 | -0.1535 |
| Hs.57876.0.A1_3p_at    | AMDD          | 0.1475 | -0.1475 |
| Hs.166011.3.A1_3p_a_at | CTNND1        | 0.1458 | -0.1458 |
| Hs.2.14894.2.S1_3p_at  | TGOLN2        | 0.1453 | -0.1453 |
| g8922916_3p_a_at       | MCTP2         | 0.1451 | -0.1451 |
| g4503112_3p_at         | CST6          | 0.143  | -0.143  |
| Hs.81800.4.A1_3p_a_at  | CSPG2         | 0.1414 | -0.1414 |
| g12654424_3p_s_at      | EPN3          | 0.1406 | -0.1406 |
| Hs.145078.1.A1_3p_at   | ROD1          | 0.139  | -0.139  |
| 218779_3p_x_at         | EPS8L1        | 0.139  | -0.139  |
| Hs.19978.5.S2_3p_at    | ARSD          | 0.1364 | -0.1364 |
| Hs.323164.0.S1_3p_a_at | CHCHD7        | 0.1361 | -0.1361 |
| g7305226_3p_at         | TMC6          | 0.1328 | -0.1328 |
| g9506670_3p_a_at       | FLJ20273      | 0.1324 | -0.1324 |
| Hs.104476.0.A1_3p_at   | TMEM125       | 0.1323 | -0.1323 |
| 208083_3p_s_at         | ITGB6         | 0.1304 | -0.1304 |
| Hs.25978.0.A1_3p_at    | PRRG4         | 0.1264 | -0.1264 |
| g4504164_3p_a_at       | GSN           | 0.1258 | -0.1258 |
| g7705942_3p_a_at       | C5orf4        | 0.124  | -0.124  |
| Hs.6390.1.A1_3p_at     | DKFZP779L1068 | 0.1235 | -0.1235 |
| Hs.50964.3.S2_3p_at    | CEACAM1       | 0.1182 | -0.1182 |

|                         |          |        |         |
|-------------------------|----------|--------|---------|
| g4929600_3p_a_at        | CAB39    | 0.1176 | -0.1176 |
| Hs.109012.1.A1_3p_x_at  | MXD1     | 0.1145 | -0.1145 |
| Hs.278628.0.S1_3p_at    | SHROOM3  | 0.1138 | -0.1138 |
| g7656943_3p_at          | LYPD3    | 0.1108 | -0.1108 |
| Hs.174104.0.S1_3p_at    | RALGPS2  | 0.1101 | -0.1101 |
| g5031846_3p_at          | LAMC2    | 0.1095 | -0.1095 |
| g7657068_3p_a_at        | ERO1L    | 0.1082 | -0.1082 |
| g4557424_3p_at          | ENTPD3   | 0.1077 | -0.1077 |
| 228531_3p_at            | SAMD9    | 0.1038 | -0.1038 |
| g4758287_3p_x_at        | EPHB3    | 0.1024 | -0.1024 |
| Hs.272556.0.S2_3p_s_at  | PADI1    | 0.1022 | -0.1022 |
| g11496995_3p_at         | ADAM28   | 0.1021 | -0.1021 |
| Hs.112184.1.A1_3p_at    | TMC4     | 0.1012 | -0.1012 |
| Hs.197751.0.A1_3p_at    | DAAM1    | 0.1009 | -0.1009 |
| g7706701_3p_at          | IL23A    | 0.1006 | -0.1006 |
| g3978241_3p_at          | SNN      | 0.0992 | -0.0992 |
| Hs.83484.0.S1_3p_at     | SOX4     | 0.0987 | -0.0987 |
| g5454161_3p_a_at        | TXNIP    | 0.0982 | -0.0982 |
| Hs.57787.0.A1_3p_at     | MTAC2D1  | 0.0978 | -0.0978 |
| Hs2.14894.2.S1_3p_x_at  | TGOLN2   | 0.0974 | -0.0974 |
| g9845499_3p_at          | LAMC2    | 0.0974 | -0.0974 |
| g4758679_3p_a_at        | LLGL2    | 0.097  | -0.097  |
| g5031992_3p_a_at        | PRSS16   | 0.0954 | -0.0954 |
| Hs.172458.4.S1_3p_a_at  | IDS      | 0.0922 | -0.0922 |
| 1553114_3p_a_at         | PTK6     | 0.0917 | -0.0917 |
| Hs.197751.2.S1_3p_a_at  | DAAM1    | 0.0904 | -0.0904 |
| g4502722_3p_at          | CDH3     | 0.0903 | -0.0903 |
| Hs.61311.0.A1_3p_at     | CAPN8    | 0.0903 | -0.0903 |
| Hs.7946.0.S3_3p_a_at    | MTUS1    | 0.088  | -0.088  |
| Hs.160483.0.S2_3p_a_at  | STOM     | 0.0873 | -0.0873 |
| Hs.45008.0.S1_3p_at     | CEACAM19 | 0.0863 | -0.0863 |
| 207291_3p_at            | PRRG4    | 0.0853 | -0.0853 |
| Hs.738.3.A1_3p_at       | S100A16  | 0.081  | -0.081  |
| Hs.323567.0.A2_3p_at    | SCARB2   | 0.0799 | -0.0799 |
| g7019410_3p_at          | HOOK2    | 0.0786 | -0.0786 |
| g4502748_3p_at          | CDKN2A   | 0.0771 | -0.0771 |
| Hs.193341.0.A1_3p_at    | APRIN    | 0.075  | -0.075  |
| g8272417_3p_a_at        | KLF5     | 0.0725 | -0.0725 |
| Hs.62643.0.S1_3p_a_at   | DAPP1    | 0.0717 | -0.0717 |
| g7662329_3p_s_at        | ABLIM3   | 0.0715 | -0.0715 |
| Hs.159651.0.S2_3p_x_at  | TNFRSF21 | 0.071  | -0.071  |
| Hs2.210473.1.S1_3p_s_at | SCIN     | 0.0691 | -0.0691 |
| g13129073_3p_at         | PRRG4    | 0.0651 | -0.0651 |
| Hs.16578.0.A1_3p_at     | PDE5A    | 0.0635 | -0.0635 |
| g4758943_3p_at          | REPS2    | 0.0627 | -0.0627 |
| g8922660_3p_at          | LRRC1    | 0.0611 | -0.0611 |
| g4504808_3p_s_at        | JUNB     | 0.0603 | -0.0603 |
| Hs.217484.0.A1_3p_at    | ANKRD22  | 0.0583 | -0.0583 |
| g12053382_3p_at         | SLC40A1  | 0.0581 | -0.0581 |
| Hs.49657.1.A2_3p_at     | ZNRF1    | 0.0568 | -0.0568 |
| g6912705_3p_at          | PSD4     | 0.0567 | -0.0567 |
| Hs.62643.0.S2_3p_a_at   | DAPP1    | 0.0555 | -0.0555 |
| g13487920_3p_a_at       | KIAA1815 | 0.0547 | -0.0547 |
| g1256421_3p_a_at        | PAK1     | 0.0546 | -0.0546 |

|                         |          |        |         |
|-------------------------|----------|--------|---------|
| g8922142_3p_at          | KIF21B   | 0.0541 | -0.0541 |
| g13129073_3p_x_at       | PRRG4    | 0.0541 | -0.0541 |
| Hs.234101.0.A1_3p_at    | SLC44A3  | 0.0534 | -0.0534 |
| Hs.154365.0.S1_3p_at    | ELF1     | 0.0527 | -0.0527 |
| Hs.73793.2.S2_3p_a_at   | VEGF     | 0.0505 | -0.0505 |
| g10518500_3p_a_at       | F5       | 0.0494 | -0.0494 |
| g2598967_3p_a_at        | SPINT2   | 0.0492 | -0.0492 |
| g4826753_3p_at          | FGFBP1   | 0.048  | -0.048  |
| Hs.40342.2.S1_3p_a_at   | TRIOBP   | 0.0479 | -0.0479 |
| Hs.49657.0.A1_3p_at     | ZNRF1    | 0.047  | -0.047  |
| g4826867_3p_a_at        | ROR1     | 0.0461 | -0.0461 |
| Hs.44343.0.A1_3p_at     | ATP8B1   | 0.0461 | -0.0461 |
| Hs.279607.3.A1_3p_at    | ROD1     | 0.0442 | -0.0442 |
| Hs.184050.1.A1_3p_a_at  | KRAS     | 0.043  | -0.043  |
| Hs.83484.0.S3_3p_x_at   | SOX4     | 0.0423 | -0.0423 |
| g11545921_3p_at         | IFIH1    | 0.0422 | -0.0422 |
| Hs.45192.0.S1_3p_at     | TSGA10   | 0.0422 | -0.0422 |
| Hs.169238.3.A1_3p_a_at  | FUT3     | 0.0419 | -0.0419 |
| Hs.83484.1.S1_3p_a_at   | SOX4     | 0.0408 | -0.0408 |
| g2735848_3p_a_at        | EDG4     | 0.0399 | -0.0399 |
| Hs.22902.0.A1_3p_at     | ZBTB25   | 0.0397 | -0.0397 |
| Hs.289005.0.S1_3p_at    | TJP2     | 0.0388 | -0.0388 |
| 224558_3p_s_at          | MALAT1   | 0.0386 | -0.0386 |
| Hs.101799.0.A1_3p_s_at  | B3GNT5   | 0.0379 | -0.0379 |
| g4503802_3p_at          | FUCA1    | 0.0377 | -0.0377 |
| g8923080_3p_a_at        | SAMD9    | 0.0375 | -0.0375 |
| g12043713_3p_a_at       | FOXP1    | 0.0373 | -0.0373 |
| Hs.183109.1.S1_3p_at    | MAOA     | 0.0366 | -0.0366 |
| g625085_3p_s_at         | MET      | 0.0358 | -0.0358 |
| g6996011_3p_at          | GBP2     | 0.0347 | -0.0347 |
| 1557448_3p_a_at         | RPL41    | 0.0342 | -0.0342 |
| g11907929_3p_a_at       | NRP2     | 0.0339 | -0.0339 |
| g4502174_3p_at          | SHROOM2  | 0.0333 | -0.0333 |
| Hs.179526.0.S2_3p_a_at  | TXNIP    | 0.0323 | -0.0323 |
| g4505792_3p_a_at        | SERPINA1 | 0.0321 | -0.0321 |
| Hs.57837.0.A1_3p_at     | TMTC2    | 0.0319 | -0.0319 |
| g4885348_3p_a_at        | GRK5     | 0.0304 | -0.0304 |
| Hs.83484.0.S3_3p_at     | SOX4     | 0.0292 | -0.0292 |
| g12006357_3p_a_at       | TRIOBP   | 0.0272 | -0.0272 |
| Hs.183765.0.A1_3p_at    | UCA1     | 0.0259 | -0.0259 |
| g5174646_3p_at          | PTK6     | 0.0251 | -0.0251 |
| Hs.159651.0.S2_3p_at    | TNFRSF21 | 0.0246 | -0.0246 |
| Hs.26765.0.S1_3p_at     | LOC58489 | 0.0239 | -0.0239 |
| g11386170_3p_at         | CEACAM5  | 0.0234 | -0.0234 |
| Hs.21599.0.S2_3p_at     | KLF7     | 0.0233 | -0.0233 |
| Hs.6975.2.A2_3p_s_at    | MALAT1   | 0.0185 | -0.0185 |
| g4959037_3p_at          | RASD1    | 0.0177 | -0.0177 |
| g5817105_3p_s_at        | TSC22D3  | 0.017  | -0.017  |
| Hs.81800.0.S2_3p_a_at   | CSPG2    | 0.0169 | -0.0169 |
| Hs2.352326.1.S1_3p_a_at | CBR3     | 0.0166 | -0.0166 |
| g10835001_3p_at         | ARHGDI3  | 0.0161 | -0.0161 |
| Hs.96427.0.S1_3p_x_at   | FRMD4B   | 0.0157 | -0.0157 |
| g9845517_3p_at          | S100A6   | 0.0153 | -0.0153 |
| Hs2.334568.1.S1_3p_at   | ZNF626   | 0.0152 | -0.0152 |

|                        |          |           |           |
|------------------------|----------|-----------|-----------|
| g10518499_3p_at        | F3       | 0.0141    | -0.0141   |
| Hs.172458.0.S2_3p_s_at | IDS      | 0.0138    | -0.0138   |
| g4885208_3p_a_at       | EPHA1    | 0.0135    | -0.0135   |
| g4505896_3p_at         | PLS1     | 0.0133    | -0.0133   |
| Hs.124740.0.A1_3p_at   | TAF9     | 0.0123    | -0.0123   |
| g13477352_3p_s_at      | RPH3AL   | 0.0116    | -0.0116   |
| Hs.105509.1.S2_3p_at   | SLC44A2  | 0.0113    | -0.0113   |
| Hs.272068.0.S1_3p_at   | FAM83A   | 0.0096    | -0.0096   |
| Hs.109012.1.A1_3p_at   | MXD1     | 0.0088    | -0.0088   |
| g5453622_3p_at         | CNKSR1   | 0.0085    | -0.0085   |
| Hs.170218.0.A1_3p_at   | KIAA0251 | 0.0079    | -0.0079   |
| Hs.125343.0.A1_3p_at   | GPR110   | 0.0071    | -0.0071   |
| Hs.286124.1.A1_3p_s_at | CD24     | 0.0062    | -0.0062   |
| g9845517_3p_x_at       | S100A6   | 0.0062    | -0.0062   |
| g13376358_3p_a_at      | DENND2D  | 0.0046    | -0.0046   |
| 207517_3p_at           | LAMC2    | 0.0038    | -0.0038   |
| g7262371_3p_at         | BIK      | 0.0037    | -0.0037   |
| Hs.182536.0.S1_3p_s_at | KIAA0284 | 0.002     | -0.002    |
| Hs.238030.1.S1_3p_x_at | SCAMP2   | 0.0011    | -0.0011   |
| g220150_3p_x_at        | AZGP1    | 9.00E-04  | -9.00E-04 |
| Hs.44021.0.S1_3p_at    | BMF      | 8.00E-04  | -8.00E-04 |
| Hs.183861.0.S1_3p_at   | CHMP4C   | 7.00E-04  | -7.00E-04 |
| Hs.6616.0.A1_3p_at     | HNRPU    | -8.00E-04 | 8.00E-04  |
| Hs.89868.0.A1_3p_at    | SLC39A14 | -0.003    | 0.003     |
| 4876811C_3p_x_at       | PARVB    | -0.0039   | 0.0039    |
| g4885454_3p_at         | SH2B3    | -0.0068   | 0.0068    |
| Hs.88045.0.A1_3p_at    | FLJ45482 | -0.0073   | 0.0073    |
| Hs.1565.0.S1_3p_at     | NEDD4    | -0.0077   | 0.0077    |
| Hs.5151.0.S5_3p_at     | IPO7     | -0.0089   | 0.0089    |
| g13540568_3p_s_at      | SGPP1    | -0.0106   | 0.0106    |
| g12652938_3p_a_at      | USP47    | -0.0107   | 0.0107    |
| Hs.136857.0.S1_3p_at   | HIST1H1D | -0.0118   | 0.0118    |
| Hs.748.8.A1_3p_at      | FGFR1    | -0.0127   | 0.0127    |
| 4902565C_3p_at         | MRC2     | -0.0198   | 0.0198    |
| Hs.1494.1.A1_3p_at     | MSX1     | -0.0199   | 0.0199    |
| g4503698_3p_s_at       | FGF2     | -0.0224   | 0.0224    |
| g4507426_3p_s_at       | TEAD4    | -0.0287   | 0.0287    |
| Hs.281895.0.S1_3p_x_at | AGPAT5   | -0.029    | 0.029     |
| Hs.72160.0.S2_3p_at    | WDHD1    | -0.0292   | 0.0292    |
| Hs.201769.0.A1_3p_at   | B4GALT6  | -0.0296   | 0.0296    |
| Hs.11390.0.S1_3p_at    | TTC28    | -0.0322   | 0.0322    |
| Hs.184771.1.S1_3p_x_at | NFIC     | -0.0326   | 0.0326    |
| Hs.9195.1.S1_3p_x_at   | RAPGEF1  | -0.0343   | 0.0343    |
| g11065969_3p_at        | ZIC2     | -0.0366   | 0.0366    |
| Hs.26797.0.S1_3p_at    | RAB6IP1  | -0.0372   | 0.0372    |
| Hs.201769.0.A1_3p_x_at | B4GALT6  | -0.0398   | 0.0398    |
| Hs2.389054.1.A1_3p_at  | RECK     | -0.041    | 0.041     |
| g5031864_3p_at         | LHFP     | -0.0472   | 0.0472    |
| Hs.48793.1.S2_3p_at    | ST3GAL3  | -0.0474   | 0.0474    |
| Hs2.376912.1.S1_3p_at  | MSRB3    | -0.0482   | 0.0482    |
| Hs.26425.0.A1_3p_at    | HNRPU    | -0.0493   | 0.0493    |
| Hs.302738.0.S1_3p_at   | SLC26A2  | -0.0493   | 0.0493    |
| g182984_3p_a_at        | PMP22    | -0.0548   | 0.0548    |
| g7661529_3p_at         | MAGEH1   | -0.0559   | 0.0559    |

|                         |                                 |         |        |
|-------------------------|---------------------------------|---------|--------|
| g4809281_3p_s_at        | BMP6                            | -0.0588 | 0.0588 |
| g11641296_3p_at         | ROBO3                           | -0.0596 | 0.0596 |
| Hs.43761.1.A1_3p_at     | GJA7                            | -0.0609 | 0.0609 |
| Hs.134069.0.A1_3p_at    | TMEM20                          | -0.0616 | 0.0616 |
| 230110_3p_at            | MCOLN2                          | -0.062  | 0.062  |
| Hs.301957.0.A2_3p_at    | SEC61A2                         | -0.0642 | 0.0642 |
| g4758593_3p_at          | IL11RA                          | -0.0645 | 0.0645 |
| g7705982_3p_at          | COPZ2                           | -0.0646 | 0.0646 |
| Hs.117929.0.A1_3p_at    | UNKNOWN/INVALID SYMBOL:(642705) | -0.0648 | 0.0648 |
| Hs.12772.0.S1_3p_at     | NIN                             | -0.0657 | 0.0657 |
| Hs.42927.0.S1_3p_at     | ANTXR1                          | -0.0677 | 0.0677 |
| g8922910_3p_at          | RSAD1                           | -0.0721 | 0.0721 |
| Hs.259855.0.S3_3p_at    | EEF2K                           | -0.0722 | 0.0722 |
| Hs.238272.0.A2_3p_at    | ITPR2                           | -0.0728 | 0.0728 |
| Hs2.321261.1.S1_3p_s_at | C14orf135                       | -0.0756 | 0.0756 |
| g8922811_3p_a_at        | CWF19L1                         | -0.0826 | 0.0826 |
| Hs.32556.0.S1_3p_at     | ANKRD28                         | -0.0861 | 0.0861 |
| 241864_3p_x_at          | PPP4R2                          | -0.1032 | 0.1032 |
| Hs.18653.0.S2_3p_at     | TMEM118                         | -0.1078 | 0.1078 |
| Hs.24678.0.S2_3p_at     | SGPP1                           | -0.1137 | 0.1137 |
| g12653240_3p_x_at       | TSPAN4                          | -0.1145 | 0.1145 |
| g7657497_3p_at          | RAGE                            | -0.1163 | 0.1163 |
| Hs.35092.0.A1_3p_at     | MSRB3                           | -0.1199 | 0.1199 |
| Hs.17154.0.S1_3p_at     | DYRK4                           | -0.1212 | 0.1212 |
| Hs.100292.0.A1_3p_at    | FLJ36166                        | -0.1261 | 0.1261 |
| Hs.55950.0.S1_3p_at     | ALPK2                           | -0.1308 | 0.1308 |
| Hs.31685.0.A1_3p_at     | BCAP29                          | -0.1315 | 0.1315 |
| g13375863_3p_at         | C14orf139                       | -0.1316 | 0.1316 |
| 4858229C_3p_at          | CSPG5                           | -0.1317 | 0.1317 |
| Hs.19762.0.S1_3p_at     | TTC7B                           | -0.1323 | 0.1323 |
| Hs.12896.0.S1_3p_at     | SATB2                           | -0.1357 | 0.1357 |
| Hs.232068.2.A1_3p_s_at  | <b>TCF8</b>                     | -0.1358 | 0.1358 |
| 37966_3p_at             | PARVB                           | -0.1451 | 0.1451 |
| g4505266_3p_at          | MSX1                            | -0.1497 | 0.1497 |
| 4876812C_3p_x_at        | PARVB                           | -0.1546 | 0.1546 |
| Hs.173051.0.A2_3p_x_at  | SLC35B4                         | -0.1567 | 0.1567 |
| Hs.29019.0.A1_3p_at     | OSTM1                           | -0.1575 | 0.1575 |
| Hs.134156.0.A1_3p_at    | IKIP                            | -0.1622 | 0.1622 |
| Hs.21255.0.A1_3p_at     | SFXN1                           | -0.1634 | 0.1634 |
| g12407394_3p_at         | TRIM7                           | -0.1652 | 0.1652 |
| g8922402_3p_a_at        | KIAA1212                        | -0.1653 | 0.1653 |
| Hs.30936.0.A1_3p_at     | MGC39900                        | -0.1693 | 0.1693 |
| Hs.35841.2.S1_3p_at     | NFIX                            | -0.173  | 0.173  |
| g12654386_3p_at         | PDLIM3                          | -0.1804 | 0.1804 |
| Hs.34892.0.S4_3p_at     | MIB1                            | -0.1858 | 0.1858 |
| Hs.288368.0.A2_3p_at    | MLSTD2                          | -0.2038 | 0.2038 |
| g11863155_3p_at         | RECK                            | -0.2051 | 0.2051 |
| Hs2.385650.1.S1_3p_at   | LOC401068                       | -0.2107 | 0.2107 |
| Hs.12319.0.S1_3p_x_at   | ALS2CR4                         | -0.2192 | 0.2192 |
| g4506044_3p_at          | PRG1                            | -0.2212 | 0.2212 |
| 4876812C_3p_at          | PARVB                           | -0.2214 | 0.2214 |
| Hs.303084.0.S3_3p_at    | APLN                            | -0.249  | 0.249  |
| g7661737_3p_at          | OSTM1                           | -0.2662 | 0.2662 |
| Hs.124707.0.A1_3p_at    | FAM101B                         | -0.2671 | 0.2671 |

|                         |           |         |        |
|-------------------------|-----------|---------|--------|
| Hs.50724.1.A1_3p_s_at   | LOC541471 | -0.2795 | 0.2795 |
| Hs.71523.0.A1_3p_at     | IKIP      | -0.2827 | 0.2827 |
| Hs.232400.1.S1_3p_s_at  | HNRPA2B1  | -0.2901 | 0.2901 |
| Hs.99263.0.A1_3p_at     | RHOT1     | -0.3145 | 0.3145 |
| Hs.159475.0.S1_3p_at    | LOC153346 | -0.323  | 0.323  |
| g10441414_3p_a_at       | DYRK3     | -0.3376 | 0.3376 |
| Hs.12451.0.S2_3p_at     | EML1      | -0.3496 | 0.3496 |
| Hs.158923.0.S1_3p_at    | RYK       | -0.3512 | 0.3512 |
| g7661737_3p_x_at        | OSTM1     | -0.3576 | 0.3576 |
| Hs.171637.0.A3_3p_at    | KCTD15    | -0.3619 | 0.3619 |
| Hs.65264.0.A1_3p_at     | PAX6      | -0.3767 | 0.3767 |
| g4505866_3p_a_at        | PLCB4     | -0.3869 | 0.3869 |
| Hs.145365.0.S2_3p_at    | WDR35     | -0.3869 | 0.3869 |
| g1458119_3p_a_at        | CHRNA7    | -0.3871 | 0.3871 |
| Hs.97600.0.A1_3p_at     | PPP4R2    | -0.3898 | 0.3898 |
| Hs.187932.0.A1_3p_at    | FAM101B   | -0.3906 | 0.3906 |
| Hs.303090.1.A1_3p_at    | LIX1L     | -0.3965 | 0.3965 |
| Hs.283006.0.S2_3p_at    | PLCB4     | -0.4027 | 0.4027 |
| g4501882_3p_s_at        | ACTA2     | -0.4113 | 0.4113 |
| Hs.12319.0.S1_3p_at     | ALS2CR4   | -0.4134 | 0.4134 |
| g4506140_3p_at          | HTRA1     | -0.4142 | 0.4142 |
| Hs.105621.0.S1_3p_at    | ABP1      | -0.4243 | 0.4243 |
| Hs.8966.0.A1_3p_at      | ANTXR1    | -0.4492 | 0.4492 |
| g4809274_3p_a_at        | ANXA6     | -0.4636 | 0.4636 |
| Hs.12385.1.S1_3p_at     | HSPA12A   | -0.4694 | 0.4694 |
| Hs2.407360.1.A1_3p_s_at | MAGEE1    | -0.4877 | 0.4877 |
| 216272_3p_x_at          | SYDE1     | -0.4892 | 0.4892 |
| 218196_3p_at            | OSTM1     | -0.4901 | 0.4901 |
| g4758267_3p_a_at        | EML1      | -0.5204 | 0.5204 |
| Hs.128751.0.S1_3p_at    | TUB       | -0.5238 | 0.5238 |
| g4507086_3p_at          | SMARCD3   | -0.5303 | 0.5303 |
| g8922558_3p_at          | NUDT11    | -0.5377 | 0.5377 |
| g12653878_3p_a_at       | SYNGR1    | -0.5578 | 0.5578 |
| g4505614_3p_s_at        | PAX6      | -0.5814 | 0.5814 |
| Hs.86178.1.S1_3p_a_at   | MPHOSPH9  | -0.6728 | 0.6728 |
| Hs.123022.0.S2_3p_at    | ADRA2C    | -0.7053 | 0.7053 |
| Hs.170337.0.A1_3p_at    | TXNRD1    | -0.7162 | 0.7162 |
| Hs2.399761.1.S1_3p_at   | MPHOSPH9  | -0.7232 | 0.7232 |
| Hs.35092.0.A2_3p_at     | MSRB3     | -0.7408 | 0.7408 |
| Hs.6728.0.S1_3p_at      | EPB41L5   | -0.7513 | 0.7513 |
| Hs.154145.3.A1_3p_at    | MPPE1     | -0.8687 | 0.8687 |
| g4759125_3p_at          | SLC1A3    | -0.8725 | 0.8725 |
| Hs.9291.0.S1_3p_s_at    | SYDE1     | -0.9064 | 0.9064 |
| Hs.133878.0.A1_3p_s_at  | MSRB3     | -1.1698 | 1.1698 |
| Hs.46919.0.S1_3p_at     | LOC439949 | -1.4256 | 1.4256 |
| g8922708_3p_at          | FLJ10847  | -1.6416 | 1.6416 |

**Supplementary Table 2.** The RNAi Consortium (TRC) Clone Names and target sequences for shRNA vectors used in this study.

| Clone Name | Designation | Sequence | Target Region |
|------------|-------------|----------|---------------|
|------------|-------------|----------|---------------|

|                      |             |                       |        |
|----------------------|-------------|-----------------------|--------|
| NM_002485.3-705s1c1  | Control sh  | CCTCTTGATGAACCATCTATT | CDS    |
| NM_004985.3-570s1c1  | shK-RasA    | CTCAGGACTTAGCAAGAAGTT | CDS    |
| NM_033360.2-269s1c1  | shK-RasB    | GACGAATATGATCCAACAATA | CDS    |
| NM_004985.x-1160s1c1 | shK-RasC    | CAGTTGAGACCTTCTAATTGG | 3' UTR |
| NM_000888.3-2128s1c1 | shITGB6-A   | GCCTCCAAACATTCCCATGAT | CDS    |
| NM_000888.3-659s1c1  | shITGB6-B   | CCATTGACAAATGATGCTGAA | CDS    |
| NM_144590.1-917s1c1  | shANKRD22-A | CCATGGCCGTAATCCTTCTAA | CDS    |
| NM_144590.1-504s1c1  | shANKRD22-B | CTTGTACGAATGCTACTTGAT | CDS    |
| NM_003177.3-245s1c1  | shSYK-A     | GCATGAGTGATGGGCTTTATT | CDS    |
| NM_003177.x-579s1c1  | shSYK-B     | GCAGGCCATCATCAGTCAGAA | CDS    |
| NM_002447.x-609s1c1  | shMST1R-A   | CCTCCTATTTCTACGTGGCAT | CDS    |
| NM_002447.x-4136s1c1 | shMST1R-B   | GAGATGAATGTGCGTCCAGAA | CDS    |
| NM_030751.2-3706s1c1 | shZeb1      | GCAACAATACAAGAGGTAAA  | 3' UTR |

---
